# Supplementary material
Source: Springer Nature journal article supplement (https://www.springermedizin.de/resource/supplementary/13045_2011_171_MOESM5_ESM.pdf/9660806)

**Sall4A****Sall4B****GFP**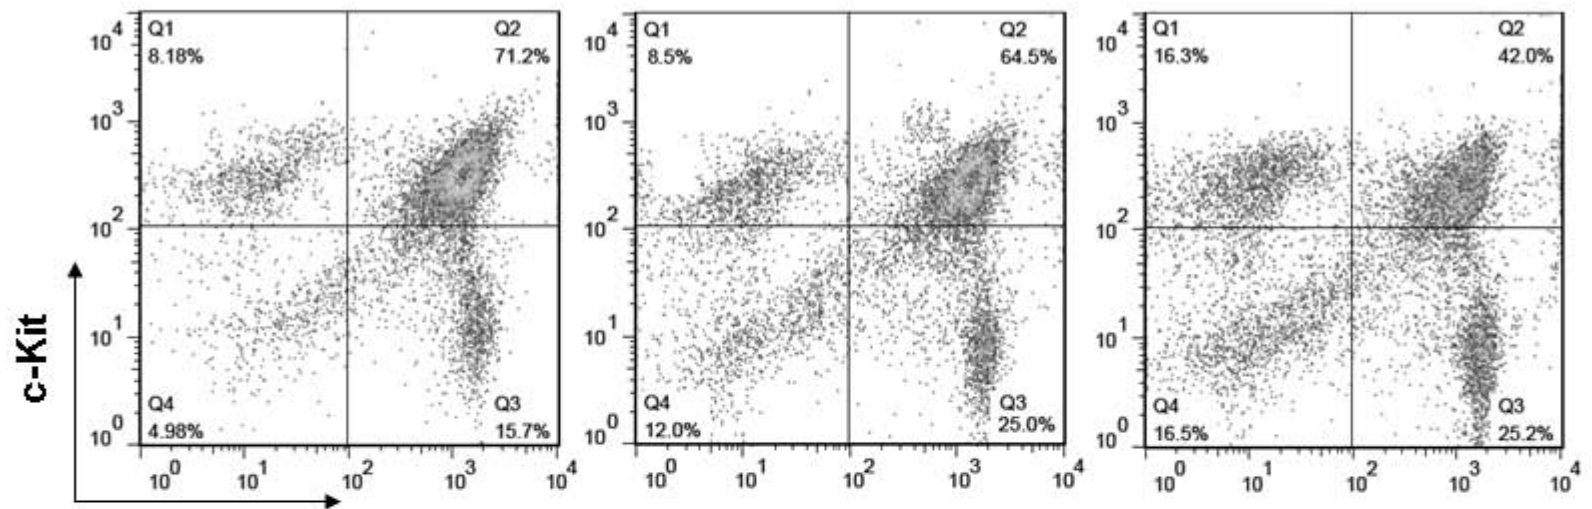**Sca-1**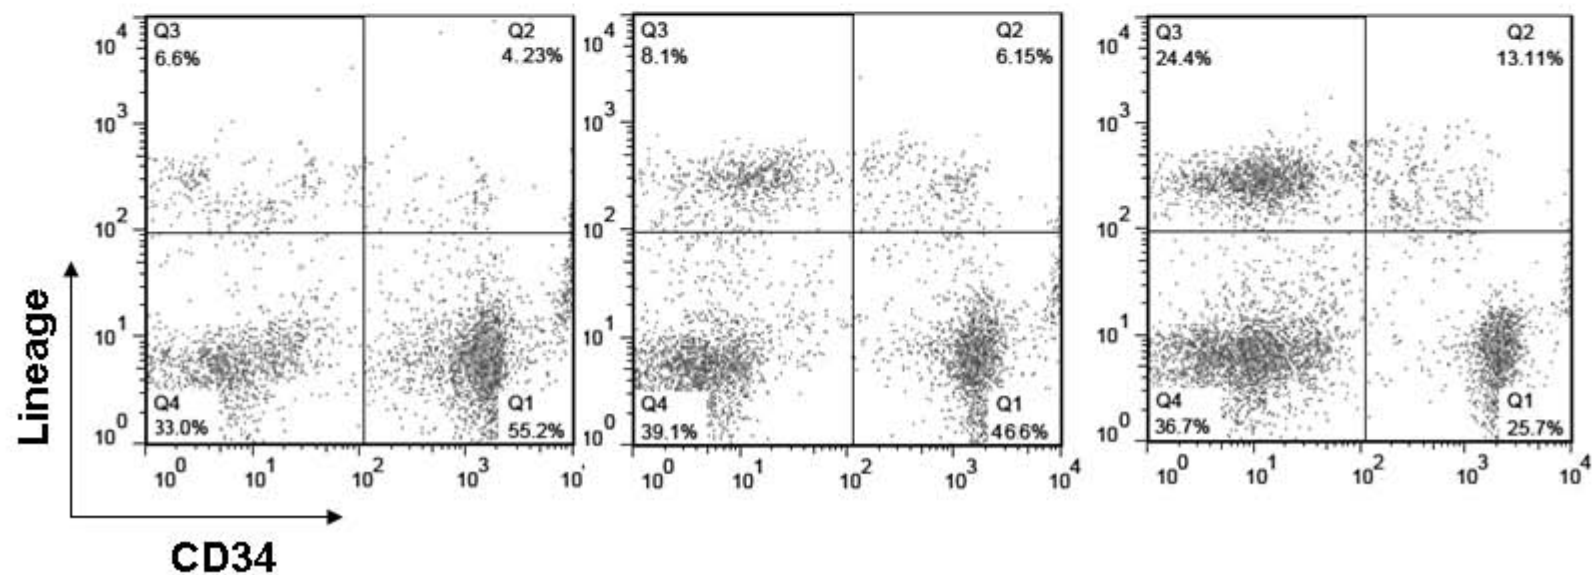

Supplement: MOESM5 [file 9660806]
